# Supplementary material for: Reducing publication delay to improve the efficiency and impact of conservation science
Source: bioRxiv or medRxiv preprint supplement (doi:10.1101/2021.03.30.437223), 2021-04-01
Supplement: Supplementary file [file media-1.pdf]

**Supporting Information provided with:**

*Christie, White et al., Reducing publication delay to improve the efficiency and impact of conservation science.*

**DOI:**

XXX

# Supporting Information

Table S1 — Recognised journals (according to SCImago (2020)) for studies in the Conservation Evidence database, analysed in the current paper.

|                                                                   |
|-------------------------------------------------------------------|
| <b>Recognised journals</b>                                        |
| Accident Analysis And Prevention                                  |
| Acta Agriculturae Scandinavica — Section B Soil And Plant Science |
| Acta Chiropterologica                                             |
| Acta Herpetologica                                                |
| Acta Horticulturae                                                |
| Acta Oecologica                                                   |
| Acta Phytopathologica Et Entomologica Hungarica                   |
| Acta Theriologica Sinica                                          |
| African Journal Of Ecology                                        |
| African Journal Of Herpetology                                    |
| African Journal Of Marine Science                                 |
| Agrarforschung Schweiz                                            |
| Agricultural And Forest Entomology                                |
| Agricultural Water Management                                     |
| Agriculture, Ecosystems And Environment                           |
| Agroecology And Sustainable Food Systems                          |
| Agroforestry Systems                                              |

Agronomy For Sustainable Development

Agronomy Journal

Agronomy Research

Ambio

American Bee Journal

American Journal Of Botany

American Journal Of Enology And Viticulture

American Journal Of Potato Research

American Journal Of Primatology

American Midland Naturalist

Amphibia — Reptilia

Amphibian & Reptile Conservation

Animal

Animal Behaviour

Animal Biology

Animal Conservation

Animal Welfare

Annales Botanici Fennici

Annales De Limnologie

Annales Zoologici Fennici

Annals Of Applied Biology

Annals Of Botany

Annals Of Forest Science

Anthozoos

Apidologie

Applied Animal Behaviour Science

Applied Entomology And Zoology

Applied Soil Ecology

Applied Vegetation Science

Aquacultural Engineering

Aquaculture

Aquaculture International

Aquaculture Nutrition

Aquaculture Research

Aquatic Conservation: Marine And Freshwater Ecosystems

Aquatic Ecology

Aquatic Ecosystem Health & Management

Aquatic Invasions

Aquatic Living Resources

Archives Of Environmental Contamination And Toxicology

Arctic, Antarctic, And Alpine Research

Ardea

Auk

Austral Ecology

Australian Forestry

Australian Journal Of Zoology

Australian Mammalogy

Australian Zoologist

Basic And Applied Ecology

Bioagro

Biocontrol Science And Technology

Biodiversity And Conservation

Biofouling

Biological Agriculture And Horticulture

Biological Bulletin

Biological Conservation

Biological Control

Biological Invasions

Biological Journal Of The Linnean Society

Biology And Environment

Biology And Fertility Of Soils

Biology Letters

Biomass And Bioenergy

Bioresource Technology

Bioscience

Biota Neotropica

Biotropica

Bird Conservation International

Bird Study

BMC Evolutionary Biology

Botany

Brazilian Journal Of Biology

British Birds

British Wildlife

Bryologist

Bulletin Of Entomological Research

California Agriculture

California Fish And Game

Canadian Entomologist

Canadian Field-Naturalist

Canadian Journal Of Fisheries And Aquatic Sciences

Canadian Journal Of Forest Research

Canadian Journal Of Plant Pathology

Canadian Journal Of Soil Science

Canadian Journal Of Zoology

Catena

Community Ecology

Comparative Biochemistry And Physiology. Part A, Molecular & Integrative Physiology

Comparative Medicine

Condor

Conservation Biology

Conservation Evidence

Conservation Genetics

Conservation Letters

Conservation Science Western Australia

Copeia

Coral Reefs

Corella

Crop Protection

Crustaceana

Cryobiology

Cryo-Letters

Diseases Of Aquatic Organisms

Diversity

Diversity And Distributions

Ecography

Ecohealth

Ecological Applications

Ecological Economics

Ecological Engineering

Ecological Entomology

Ecological Indicators

Ecological Management & Restoration

Ecological Research

Ecological Restoration

Ecology

Ecology And Evolution

Ecology And Society

Ecology Letters

Ecology, Environment And Conservation



Ecosphere

Ecosystems

Emu

Endangered Species Research

Entomologia Experimentalis Et Applicata

Entomologia Generalis

Entomologica Fennica

Entomologist's Gazette

Environmental Conservation

Environmental Entomology

Environmental Evidence

Environmental Management

Environmental Pollution

Environmental Science And Pollution Research

Environmental Toxicology And Chemistry

Environmental Toxicology And Pharmacology

Estuarine, Coastal And Shelf Science

Ethology Ecology And Evolution

European Journal Of Agronomy

European Journal Of Forest Research

European Journal Of Soil Biology

European Journal Of Soil Science

European Journal Of Wildlife Research

Field Crops Research

Fire Ecology

Fisheries Management And Ecology

Fisheries Research

Folia Geobotanica

Folia Horticulturae

Folia Primatologica

Folia Zoologica

Forest Ecology And Management

Forest Science

Forest Systems

Forestry

Forestry Chronicle

Freshwater Biology

Frontiers In Earth Science

Frontiers In Ecology And Evolution

Frontiers In Ecology And The Environment

Functional Ecology

Genesis

Genetics And Molecular Research

Geoderma

Global Change Biology

Global Ecology And Conservation

Grass And Forage Science

Grassland Science

Great Lakes Entomologist

HAYATI Journal Of Biosciences

Herpetologica

Herpetological Bulletin

Herpetological Conservation And Biology

Herpetological Journal

Herpetological Review

Hormones And Behavior

Hortscience

Horttechnology

Human-Wildlife Interactions

Hydrobiologia

Hystrix

Ibis

ICES Journal Of Marine Science

Insect Conservation And Diversity

Insect Science

Insectes Sociaux

International Agrophysics

International Biodeterioration And Biodegradation

International Journal Of Ecology

International Journal Of Pest Management

International Journal Of Primatology

International Journal Of Tropical Insect Science

International Journal Of Wildland Fire

International Review Of Hydrobiology

International Zoo Yearbook

Invasive Plant Science And Management

ISME Journal

Japanese Journal Of Applied Entomology And Zoology

Journal For Nature Conservation

Journal Of Agricultural And Food Chemistry

Journal Of Agricultural Science

Journal Of Agronomy And Crop Science

Journal Of Animal And Plant Sciences

Journal Of Animal Ecology

Journal Of Animal Science

Journal Of Apicultural Research

Journal Of Applied Animal Welfare Science

Journal Of Applied Ecology

Journal Of Applied Entomology

Journal Of Aquatic Plant Management

Journal Of Arachnology

Journal Of Arid Environments

Journal Of Avian Biology

Journal Of Chemical Ecology

Journal Of Coastal Conservation

Journal Of Coastal Research

Journal Of Ecology

Journal Of Economic Entomology

Journal Of Entomological Science

Journal Of Environmental Education

Journal Of Environmental Management

Journal Of Environmental Planning And Management

Journal Of Environmental Quality

Journal Of Environmental Studies

Journal Of Ethology

Journal Of Experimental Botany

Journal Of Experimental Zoology Part A: Ecological And Integrative Physiology

Journal Of Field Ornithology

Journal Of Fish And Wildlife Management

Journal Of Fish Biology

Journal Of Fish Diseases

Journal Of Food, Agriculture And Environment

Journal Of Forest Research

Journal Of Forest Science

Journal Of Forestry Research

Journal Of Herpetology

Journal Of Hymenoptera Research

Journal Of Insect Conservation

Journal Of Insect Science

Journal Of Invertebrate Pathology

Journal Of Mammalogy

Journal Of Molluscan Studies

Journal Of Natural History

Journal Of Nematology

Journal Of Ornithology

Journal Of Pest Science

Journal Of Pharmacological And Toxicological Methods

Journal Of Plant Diseases And Protection

Journal Of Raptor Research

Journal Of Sea Research

Journal Of Soils And Sediments

Journal Of Soils And Water Conservation

Journal Of Sustainable Forestry

Journal Of The Acoustical Society Of America

Journal Of The American Society For Horticultural Science

Journal Of The Kansas Entomological Society

Journal Of The Marine Biological Association Of The United Kingdom

Journal Of The Torrey Botanical Society

Journal Of Threatened Taxa

Journal Of Tropical Ecology

Journal Of Vegetation Science

Journal Of Wildlife Diseases

Journal Of Wildlife Management

Journal Of Wildlife Rehabilitation

Journal Of Zoo And Wildlife Medicine

Journal Of Zoology

Kasetsart Journal — Natural Science

Koedoe

Laboratory Animals

Lake And Reservoir Management

Land Degradation & Development

Landscape And Urban Planning

Landscape Ecology

Lichenologist

Limnology

Limosa

Malayan Nature Journal

Mammal Research

Mammal Review

Mammal Study



Mammalia

Mammalian Biology

Management Of Biological Invasions

Marine And Freshwater Research

Marine Ecology

Marine Ecology — Progress Series

Marine Environmental Research

Marine Mammal Science

Marine Ornithology

Marine Policy

Marine Pollution Bulletin

Mastozoologia Neotropical

Medical And Veterinary Entomology

Medical Mycology

Memoirs Of The Queensland Museum

Memoranda — Societatis Pro Fauna Et Flora Fennica

Microbial Ecology

Mires And Peat

Molecular Ecology

Munibe Antropologia-Arkeologia

Mycorrhiza

Natur Und Landschaft

Natural Areas Journal

Nature

Neurobiology Of Learning And Memory

New Forests

New Zealand Journal Of Botany

New Zealand Journal Of Crop And Horticultural Science

New Zealand Journal Of Zoology

New Zealand Plant Protection

North American Journal Of Aquaculture

North American Journal Of Fisheries Management

Northeastern Naturalist

Northwest Science

Notulae Botanicae Horti Agrobotanici Cluj-Napoca

Nutrient Cycling In Agroecosystems

Oecologia

Ohio Journal Of Sciences

Oikos

Oncoscience

Organic Agriculture

Ornis Svecica

Ornithologische Beobachter

Ornitologia Colombiana

Ornitologia Neotropical

Oryx

Outlook On Agriculture

Pachyderm

Pacific Conservation Biology

Pacific Science

Paddy And Water Environment

Pakistan Journal Of Agricultural Sciences

Pakistan Journal Of Biological Sciences

Pakistan Journal Of Scientific And Industrial Research Series B: Biological Sciences

Pedobiologia

Perspectives In Plant Ecology, Evolution And Systematics

Pest Management Science

Physiological Entomology

Phytoparasitica

Phytoprotection

Plant And Soil

Plant Breeding

Plant Disease

Plant Ecology

Plant Ecology And Diversity

Plant Ecology And Evolution

Plant Health Progress

Plant Systematics And Evolution

Planta Daninha

Plos ONE

Polar Biology

Polish Journal Of Ecology

Population Ecology

Preslia

Primate Conservation

Primates

Proceedings Of The Indian Academy Of Sciences

Proceedings Of The Latvian Academy Of Sciences, Section B: Natural, Exact, And Applied Sciences

Proceedings Of The National Academy Of Sciences Of The United States Of America

Proceedings Of The Royal Society B: Biological Sciences

Progress In Materials Science

Rangeland Ecology & Management

Renewable Agriculture And Food Systems

Reproduction

Reproduction, Fertility And Development

Reproductive Biology And Endocrinology

Research In Veterinary Science

Restoration Ecology

Revista Brasileira De Ciencia Do Solo

Revista Brasileira De Entomologia

Revista De Biologia Tropical

Revue d'Ecologie (La Terre Et La Vie)

River Research And Applications

Royal Society Open Science

Russian Journal Of Ecology

Salamandra

Scandinavian Journal Of Forest Research

Science

Science For Conservation

Scienceasia

Scientia Marina

Scientific Reports

Slovak Raptor Journal

Sociobiology

Soil And Tillage Research

Soil Biology And Biochemistry

Soil Research

Soil Science Society Of America Journal

Soil Use And Management

South African Journal Of Botany

South African Journal Of Enology And Viticulture

South African Journal Of Plant And Soil

Southeastern Naturalist

Southwestern Naturalist

Studies On Neotropical Fauna And Environment

Sustainability Science

The Scientific World Journal

Theriogenology

Therya

Transportation Research Record

Tropical Conservation Science

Tropical Ecology

Tuexenia

Turk Tarim Ve Ormancilik Dergisi/Turkish Journal Of Agriculture And Forestry

Urban Ecosystems

Ursus

Vaccine

Victorian Naturalist

Water Science And Technology

Waterbirds

Weed Biology And Management

Weed Research

Weed Science

Weed Technology

Western North American Naturalist

Wetlands

Wetlands Ecology And Management

Wildlife Biology

Wildlife Research

Wildlife Society Bulletin

Wilson Journal Of Ornithology

Zeitschrift Für Angewandte Entomologie

Zemdirbyste

Zoo Biology

Zoological Science

Zoologische Garten

Zoology And Ecology



Table S2 — Unrecognised journals (according to SCImago (2020)) for studies in the Conservation Evidence database, analysed in the current paper.

|                                                                     |
|---------------------------------------------------------------------|
| <b>Unrecognised journals</b>                                        |
| Állattani Közlemények                                               |
| Acta Academiae Agriculturae Ac Technicae Olstenensis, Agricultura   |
| Acta Biologica Slovenica                                            |
| Acta Botanica Neerlandica                                           |
| Acta Hydrobiologica Sinica                                          |
| Acta Jutlandica                                                     |
| African Primates                                                    |
| Airo                                                                |
| Alces                                                               |
| Applied Herpetology                                                 |
| Australian Journal Of Experimental Agriculture                      |
| Australian Journal Of Experimental Agriculture And Animal Husbandry |
| Barbastella                                                         |
| Bat Research News                                                   |
| Bee World                                                           |
| Bellbird                                                            |
| Biota                                                               |
| Botanica Helvetica                                                  |

Botanical Journal Of Scotland

British Journal Of Entomology And Natural History

Bulletin De La Societe Herpetologique De France

Chiroptera Neotropical

Dodo

Ecología

Entomophaga

Field Studies

Florida Scientist

Galemys

Gibbon Journal

Gibier Faune Sauvage, Game Wildlife

Gorilla Journal

Herpetofauna

Integrated Pest Management Reviews

Journal For Nature Conservation And Applied Landscape Ecology

Journal Of Agriculture And Social Sciences

Journal Of Bat Research And Conservation

Journal Of Herpetological Medicine And Surgery

Journal Of The Elisha Mitchell Scientific Society

Journal Of The Iowa Academy Of Science

Journal Of Wetlands Environmental Management

Journal Of Zoo And Aquarium Research

Journal Of Zoo And Aquatic Research

Lemur News

Lutra

Mitteilungen Der Deutschen Gesellschaft Fuer Allgemeine Und Angewandte Entomologie

Oceanographic Literature Review

Peanut Science

Pianura

Phyton (Horn)

Procedia Environmental Sciences

RAVON

Schweiz. Peckiana

Scientific Proceedings Of The Royal Dublin Society, Series A

South African Journal Of Wildlife Research

Strix

Swedish Journal Of Agricultural Research

Tearmann

Transactions Of The Illinois State Academy Of Science

Transactions Of The Missouri Academy Of Science

Transactions Of The Western Section Of The Wildlife Society

Vagos

Virginia Journal Of Science

Zeitschrift Für Jagdwissenschaft

Zeledonia

Table S3 — Publication sources for the non-journal literature that contributed studies to analyses in this paper. Names are as entered in the Conservation Evidence database.

|                                                                                                                                        |
|----------------------------------------------------------------------------------------------------------------------------------------|
| <b>Non-journal literature sources</b>                                                                                                  |
| 10th Annual Conference Of The International Association For Landscape Ecology                                                          |
| 10th International Congress Of Plant Protection: Plant Protection For Human Welfare, 20-25 November, 1983                              |
| 130 Proceedings-Vertebrate Pest Conference                                                                                             |
| 15th Meeting Of The European Grassland Federation                                                                                      |
| 1997 Brighton Crop Protection Conference — Weeds, Conference Proceedings                                                               |
| 19th Meeting Of The European Grassland Federation                                                                                      |
| 2005 Annual International Research Conference On Methyl Bromide Alternatives And Emissions Reductions, 31st October-3rd November, 2005 |
| 24th Vertebrate Pest Conference                                                                                                        |
| 7th International Safflower Conference                                                                                                 |
| A Report Submitted To The Bats And Wind Energy Cooperative.                                                                            |
| Abstracts Of The EWRS-Symposium 2007, Hamar, Norway                                                                                    |
| African Bird Club Bulletin                                                                                                             |
| African Entomology Memoir                                                                                                              |
| Agrarokologie                                                                                                                          |
| Agroforestry Forum                                                                                                                     |
| Alternative Functions Of Grassland. Proceedings Of The 15th European Grassland Federation Symposium, 7-9 September 2009                |
| American Fisheries Society Symposium                                                                                                   |

American Zoo And Aquarium Association Annual Conference Proceedings

Amphibian Ark Newsletter

Amphibian Declines: The Conservation Status Of United States Species

Amphibians And Roads: Proceedings Of The Toad Tunnel Conference

Amphibians And Roads: Toad Tunnel Conference

Análisis Espacial Y Representación Geográfica: Innovación Et Aplicación

Anzeiger Fur Schadlingskunde

Arthropod Natural Enemies In Arable Land

Arthropod Natural Enemies In Arable Land I — Density, Spatial Heterogeneity And Dispersal, Acta Jutlandica

Avian Landscape Ecology: Pure And Applied Issues In The Large-Scale Ecology Of Birds

Bats And Forests Symposium

Bats In Captivity Volume 2: Aspects Of Rehabilitation

Biodiversity And Insect Pests: Key Issues For Sustainable Management

Biodiversity News

Boletin De Sanidad Vegetal, Plagas

Bollettino Dell'istituto Di Entomologia Della Università Di Bologna

Braunschweiger Naturkundliche Schriften

British Crop Protection Conference: Pests And Diseases

British Crop Protection Council Monographs

British Grassland Society Fifth Research Conference

British Grassland Society Occasional Symposium

British Herpetological Society Bulletin

British Sugar Beet Review

BTO Research Report

Bulletin Français De La Pêche Et De La Pisciculture

Bulletin OEPP

Bulletin Of The Association Of Reptilian And Amphibian Veterinarians

Bulletin Of The Maryland Herpetological Society

Bulletin Of The Virginia Water Resources Center

Bulletin OILB SROP

California Energy Commission Report

Captive Management And Conservation Of Amphibians And Reptiles, Contributions To Herpetology Vol. 11, Society For The Study Of Amphibians And Reptiles

Carabid Beetles: Ecology And Evolution

CEFAS Final Contract Report C5256

Centre For Ecology And Hydrology Defra Project Code PH0422

Centre For Evidence-Based Conservation

Changes In The Fauna Of Wild Bees In Europe

Cities And The Environment

Coastal Meadow Management — Best Practice Guidelines

Collaboration For Environmental Evidence

Conservation And Management Of Great Crested Newts

Creating New Habitats In Intensively Used Farmland

De Levende Natuur

Declines And Disappearances Of Australian Frogs

Defra

Department Of Biological Sciences

Department Of Ecology & Evolutionary Biology

Desert Bighorn Council Transactions

Deutsche Gesellschaft Für Herpetologie Und Terrarienkunde

Durrell Institute Of Conservation And Ecology

Ecological Society Of America Annual Meeting Abstracts

Ecology And Conservation Of Lowland Farmland Birds. Spring Conference Of The British Ornithologists' Union, 27-28 March 1999

Ecology And Integrated Farming Systems

Ecosystems And Sustainable Development III, Advances In Ecological Sciences

Effect Of Sward Type And Management On Diversity Of Upland Birds.

Eighth International Herpetological Symposium

Enact



Endangered Species Bulletin

Endangered Species Update

Environmental Encounters Series: Workshop On Ecological Corridors For Invertebrates: Strategies Of Dispersal And Recolonisation In Today's Agricultural And Forestry Landscapes

EPOPS

European And Mediterranean Plant Protection Organization

European And Mediterranean Plant Protection Organization Report Number 09-15078 Rev

Exmoor Mires Partnership

Fencing For Conservation. Restriction Of Evolutionary Potential Or A Riposte To Threatening Processes?

Fibl Dossier

Field Margins: Integrating Agriculture And Conservation

Forage For Bees In An Agricultural Landscape

Forestry Commission Report

Forward With Grass Into Europe: British Grassland Society Winter Meeting

French Peatland Coordination Centre

Froglife Conservation Report No.1

Froglog

Frogs In The Community

Global Re-Introduction Perspectives: 2008. Re-Introduction Case-Studies From Around The Globe

Global Re-Introduction Perspectives: 2010. Additional Case Studies From Around The Globe

Global Re-Introduction Perspectives: 2011. More Case Studies From Around The Globe

Grassland Science In Europe

Grazing Management: The Principles And Practice Of Grazing, For Profit And Environmental Gain, Within Temperate Grassland Systems: Proceedings Of The British Grassland Society Conference, 29 February-2 March, 2000

Habitat Fragmentation & Infrastructure

Hedgerows Of The World: Their Ecological Functions In Different Landscapes, International Association For Landscape Ecology, 10th Annual Conference Of The International Association For Landscape Ecology

Herpetofauna And Roads Workshop — Is There Light At The End Of The Tunnel?

Herpetologica Bonnensis

Herpetological Society Bulletin

High Value Grassland, British Grassland Society Occasional Symposium No.38

High Value Grassland: Providing Biodiversity, A Clean Environment And Premium Products. British Grassland Society Occasional Symposium No.38

High Value Grassland: Providing Biodiversity, A Clean Environment And Premium Products. . British Grassland Society Occasional Symposium No.38

High Value Grassland: Providing Biodiversity, A Clean Environment And Premium Products, British Grassland Society Occasional Symposium

How To Protect Or What We Know About Carabid Beetles: From Knowledge To Application, From Wijster (1969) To Tuczno (2001), 2002 Conference

ICROFS News

IFOAM 2000: The World Grows Organic

In Practice: Bulletin Of The Chartered Institute Of Ecology And Environmental Management

USDA-ARS-SABCL (South American Biological Control Laboratory). Annual Report, 2011

Infos-Ctifl

Insect Pest Management

International Conference On Habitat Fragmentation Due To Transportation Infrastructure

International Occasional Symposium Of The European Grassland Federation.

International Symposium And Workshop On Tropical Peatland

IOBC/Wprs Bulletin

IOBC/WPRS Bulletin

ITE Symposium

Joint Meeting Between The British Grassland Society And The British Ecological Society: Grassland Management And Nature Conservation. British Grassland Society Occasional Symposium

Kalimantan Forests And Climate Partnership

Land Retirement Demonstration Project Five Year Report

Landscape Management For Functional Biodiversity 2nd Working Group Meeting. 16-19 May 2006.

Landscape Management For Functional Biodiversity, 2nd Working Group Meeting

LIFE Project: Anglesey & Llyn Fens

Livestock Farming Systems: Integrating Animal Science Advances In The Search Of Sustainability

London Naturalist

Möglichkeiten Und Grenzen Der Ökologisierung Der Landwirtschaft: Wissenschaftliche Grundlagen Und Praktische Erfahrungen; Beiträge Aus Dem Arbeitskreis

The humble bee: its life history and how to domesticate it.

Mededelingen Van De Faculteit Landbouwwetenschappen Universiteit Gent

Mitteilungen Der Biologischen Bundesanstalt Für Land-U. Forstwirtschaft

National Park Service Point Reyes National Seashore, California, USA

Natura Societa Italiana Di Scienze Naturale E Museo Civico Di Storia Naturale Milan

Natuurhistorisch Maandblad

Neotropical Primates

NERI, Technical Report

New Forest Plants Project, UK

Our Living Resources: A Report To The Nation On The Distribution, Abundance, And Health Of US Plants, Animals, And Ecosystems

Penny Anderson Associates Report

Pesticides, Cereal Farming And The Environment: The Boxworth Project

Phd Thesis

Plant Invasions: General Aspects And Special Problems

Plant Research International, Wageningen

Primate Tourism: A Tool For Conservation

Proceedings — Brighton Crop Protection Conference

Proceedings 20th German Conference On Weed Biology And Weed Control

Proceedings Of A Symposium On Cheetahs As Game Ranch Animals

Proceedings Of National Avian-Wind Power Planning Meeting IV

Proceedings Of The 1987 International Crane Workshop International Crane Foundation,

Proceedings Of The 1989 American Association Of Zoological Parks And Aquariums National Conference

Proceedings Of The 1998 International Conference On Wildlife Ecology And Transportation

Proceedings Of The 1999 International Conference On Wildlife Ecology And Transportation

Proceedings Of The 2001 International Conference On Ecology And Transportation

Proceedings Of The 2003 International Conference On Ecology And Transportation

Proceedings Of The 2005 International Conference On Ecology And Transportation

Proceedings Of The 2007 International Conference On Ecology And Transportation

Proceedings Of The 5th Annual Reptile Symposium On Captive Propagation And Husbandry

Proceedings Of The Asian Wetland Symposium

Proceedings Of The British Grassland Society/British Ecological Society Conference

Proceedings Of The Conservation And Management Of Great Crested Newts

Proceedings Of The Eastern Wildlife Damage Control Conference

Proceedings Of The Eastern Wildlife Damage Management Conference

Proceedings Of The Eleventh Vertebrate Pest Conference

Proceedings Of The Fourth International Workshop, 26-29 November 2001

Proceedings Of The Hedgerow Management And Nature Conservation: British Ecological Society Conservation Ecology Group

Proceedings Of The HGCA Conference, Arable Crop Protection In The Balance: Profit And The Environment

Proceedings Of The International Conference On Wildlife Ecology And Transportation

Proceedings Of The International Symposium On Tropical Peatlands

Proceedings Of The International Union Of Game Biologists 17th Congress

Proceedings Of The Lowland Farmland Birds III: Delivering Solutions In An Uncertain World

Proceedings Of The Ninth Wildlife Damage Management Conference

Proceedings Of The Relationship Between Nature Conservation, Biodiversity And Organic Agriculture

Proceedings Of The Sixteenth Vertebrate Pest Conference

Proceedings Of The Sixth Workshop For Tropical Agricultural Entomologists, May 1998

Proceedings Of The South Dakota Academy Of Science

Proceedings Of The Tenth Vertebrate Pest Conference

Proceedings Of The Thirteenth Australian Weeds Conference

Proceedings Of The Trends In Addressing Transportation Related Wildlife Mortality: Transportation Related Wildlife Mortality Seminar, FL-ER-58-96

Proceedings Of The Trends In Addressing Wildlife Mortality: Transportation Related Wildlife Mortality Seminar, FL-ER-58-96

Proceedings The Joint Meeting Between The British Grassland Society And The British Ecological Society. Grassland Management And Nature Conservation

Proceedings, Soil And Crop Science Society Of Florida

Protecting Threatened Bats At Coal Mines: A Technical Interactive Forum

Raised Bog Management For Biological Diversity Conservation In Latvia

Recent Developments In Cereal Production.

Re-Creating Plant And Beetle Assemblages Of Species-Rich Chalk Grasslands On Ex-Arable Land

Regional Meetings Of The American Association Of Zoological Parks And Aquariums

Rehabilitation Of Oiled African Penguins: A Conservation Success Story

Re-Introduction News

RELU Policy And Practice Note, Number 37 Report

Rencontre Recherche Ruminants

Report For Confederación Hidrográfica Del Ebro

Report To Infra Econetwork Europe (IENE), Fifth IENE Meeting

Report To INRENA

Report To Syngenta

Report To The Nature Conservancy Council (GB)

Restoration Of Endangered Species: Conceptual Issues, Planning And Implementation

Restoration Of Temperate Wetlands

RSPB

School Of Graduate Studies And Research

Scottish Natural Heritage Reports

Seabird Bycatch: Trends, Roadblocks And Solutions

Second International Symposium On Biological Control Of Arthropods, September 12-16, 2005

Simposio: Estado Del Conocimiento De La Biología Reproductiva De Las Especies De Loros Amenazados De Colombia Con Énfasis En Iniciativas De Conservación

Simposio: Estado Del Conocimiento De La Biología Reproductiva De Las Especies De Loros Amenazados De Colombia Con Énfasis En Iniciativas De Conservación. II Congreso Colombiano De Zoología

Sonoma State University And Marin/Sonoma Mosquito And Vector Control District, Sonoma, California

Status And Conservation Of Midwestern Amphibians

Suffolk Natural History

Systematic Review No. 11. Collaboration For Environmental Evidence / Centre For Evidence-Based Conservation

Technical Bulletin, Agricultural Experiment Station, University Of Maine

Terra Australis

The Brighton Crop Protection Conference — Weeds

The Ecology And Conservation Of Lowland Farmland Birds

The Ecology Of Temperate Cereal Fields

The National Trust Conservation Newsletter

The Structure And Functioning Of Flower-Visiting Insect Communities On Hay Meadows

Timber, Tourists And Temples. Conservation And Development In The Maya Forest Of Belize, Guatemala And Mexico



Tropical Peat Swamp Forest Silviculture In Central Kalimantan

TWSG News

Unpublished Report Commissioned By The National Trust

Unpublished Report To The West Sussex Heathlands Project

Urban Herpetology

Use Of The Tubingen Mix For Bee Pasture In Germany

Verhandlungen Der Gesellschaft Fur Okologie

Vingtième Conférence Du Columa Journées Internationales Sur La Lutte Contre Les Mauvaises Herbes

Wading Birds

WAIT School Of Biology Bulletin

Washington Sea Grant Program, University Of Washington Report

Western Foundation Of Vertebrate Zoology

Wolves: Behavior, Ecology, And Conservation

ZEF Bonn

Table S4 — Mean publication delay (and associated 95% Confidence Intervals (CI) and numbers of studies) for each Conservation Evidence synopsis (a collection of studies based on the conservation subject in which interventions have been tested). Mean values and 95% CIs are presented in Figure 1 (Main Text) and were determined using a simple GLM (see Methods in Main Text) with only synopsis as a fixed effect. The number of studies for each synopsis may not match the Conservation Evidence website as the database is being dynamically updated with more studies over time. In addition, studies can be present in multiple synopses, and for the purposes of our analyses we also excluded reviews and meta-analyses, as well as studies with no end date of data collection.

| Synopsis                                   | Mean | Upper 95% CI | Lower 95% CI | Number of studies |
|--------------------------------------------|------|--------------|--------------|-------------------|
| Amphibian Conservation                     | 2.31 | 2.52         | 2.11         | 547               |
| Bat Conservation                           | 2.82 | 3.17         | 2.48         | 237               |
| Bee Conservation                           | 3.01 | 3.42         | 2.59         | 175               |
| Bird Conservation                          | 3.98 | 4.14         | 3.82         | 1548              |
| Control of Freshwater Invasive Species     | 2.41 | 2.86         | 1.95         | 115               |
| Farmland Conservation                      | 3.73 | 3.93         | 3.54         | 971               |
| Forest Conservation                        | 4.16 | 4.48         | 3.84         | 399               |
| Management of Captive Animals              | 1.97 | 2.41         | 1.53         | 101               |
| Mediterranean Farmland                     | 3.70 | 3.92         | 3.48         | 737               |
| Natural Pest Control                       | 3.80 | 4.28         | 3.32         | 163               |
| Peatland Conservation                      | 3.77 | 4.14         | 3.41         | 277               |
| Primate Conservation                       | 2.66 | 2.94         | 2.38         | 343               |
| Shrubland and Heathland Conservation       | 3.59 | 4.01         | 3.18         | 207               |
| Soil Fertility                             | 3.92 | 4.36         | 3.47         | 196               |
| Subtidal Benthic Invertebrate Conservation | 4.35 | 4.78         | 3.91         | 226               |
| Sustainable Aquaculture                    | 2.58 | 3.31         | 1.86         | 48                |
| Terrestrial Mammal Conservation            | 3.72 | 3.89         | 3.54         | 1187              |

Table S5 — Results of quasi-Poisson Generalised Linear Model (GLM) (see Methods). The synopsis 'Management of Captive Animals' and publication source 'non-journal literature' were set as the intercept. p-values of 0.000 represent  $p < 0.001$ .

| Parameter                                  | Estimate | Standard Error | t-value | p-value |
|--------------------------------------------|----------|----------------|---------|---------|
| Intercept                                  | -8.044   | 2.314          | -3.476  | 0.001   |
| Publication Delay                          | 0.004    | 0.001          | 3.598   | 0.000   |
| Farmland Conservation                      | 0.696    | 0.117          | 5.954   | 0.000   |
| Bird Conservation                          | 0.724    | 0.116          | 6.251   | 0.000   |
| Natural Pest Control                       | 0.698    | 0.131          | 5.335   | 0.000   |
| Control of Freshwater Invasive Species     | 0.295    | 0.149          | 1.972   | 0.049   |
| Shrubland and Heathland Conservation       | 0.580    | 0.128          | 4.525   | 0.000   |
| Terrestrial Mammal Conservation            | 0.638    | 0.116          | 5.489   | 0.000   |
| Bat Conservation                           | 0.374    | 0.130          | 2.884   | 0.004   |
| Amphibian Conservation                     | 0.263    | 0.123          | 2.149   | 0.032   |
| Bee Conservation                           | 0.441    | 0.134          | 3.298   | 0.001   |
| Forest Conservation                        | 0.715    | 0.120          | 5.941   | 0.000   |
| Primate Conservation                       | 0.340    | 0.126          | 2.706   | 0.007   |
| Peatland Conservation                      | 0.680    | 0.124          | 5.473   | 0.000   |
| Mediterranean Farmland                     | 0.589    | 0.118          | 4.993   | 0.000   |
| Subtidal Benthic Invertebrate Conservation | 0.751    | 0.125          | 6.014   | 0.000   |
| Soil Fertility                             | 0.662    | 0.128          | 5.184   | 0.000   |
| Sustainable Aquaculture                    | 0.241    | 0.184          | 1.311   | 0.19    |
| Publication source — Recognised Journal    | 0.434    | 0.044          | 9.908   | 0.000   |
| Publication source — Unrecognised Journal  | 0.247    | 0.077          | 3.212   | 0.001   |

Table S6 — Results of Tukey's all-pair comparisons (using results from quasi-Poisson Generalised Linear Model — see Methods) to test for statistically significant differences between the publication delay of studies in different synopses. Significance level = 0.05. p-values of 0.000 represent  $p < 0.001$ .

| Comparison                                                             | Estimate | Standard error | t-statistic | Adjusted p-value |
|------------------------------------------------------------------------|----------|----------------|-------------|------------------|
| Farmland Conservation — Management of Captive Animals                  | 0.696    | 0.117          | 5.954       | 0.000            |
| Bird Conservation — Management of Captive Animals                      | 0.724    | 0.116          | 6.251       | 0.000            |
| Natural Pest Control — Management of Captive Animals                   | 0.698    | 0.131          | 5.335       | 0.000            |
| Control of Freshwater Invasive Species — Management of Captive Animals | 0.295    | 0.149          | 1.972       | 0.830            |
| Shrubland and Heathland Conservation — Management of Captive Animals   | 0.580    | 0.128          | 4.525       | 0.001            |
| Terrestrial Mammal Conservation — Management of Captive Animals        | 0.638    | 0.116          | 5.489       | 0.000            |
| Bat Conservation — Management of Captive Animals                       | 0.374    | 0.130          | 2.884       | 0.204            |
| Amphibian Conservation — Management of Captive Animals                 | 0.263    | 0.123          | 2.149       | 0.716            |
| Bee Conservation — Management of Captive Animals                       | 0.441    | 0.134          | 3.298       | 0.066            |
| Forest Conservation — Management of Captive Animals                    | 0.715    | 0.120          | 5.941       | 0.000            |
| Primate Conservation — Management of Captive Animals                   | 0.340    | 0.126          | 2.706       | 0.304            |
| Peatland Conservation — Management of Captive Animals                  | 0.680    | 0.124          | 5.473       | 0.000            |

|                                                                            |        |       |        |       |
|----------------------------------------------------------------------------|--------|-------|--------|-------|
| Mediterranean Farmland — Management of Captive Animals                     | 0.589  | 0.118 | 4.993  | 0.000 |
| Subtidal Benthic Invertebrate Conservation — Management of Captive Animals | 0.751  | 0.125 | 6.014  | 0.000 |
| Soil Fertility — Management of Captive Animals                             | 0.662  | 0.128 | 5.184  | 0.000 |
| Sustainable Aquaculture — Management of Captive Animals                    | 0.241  | 0.184 | 1.311  | 0.996 |
| Bird Conservation — Farmland Conservation                                  | 0.028  | 0.034 | 0.818  | 1.000 |
| Natural Pest Control — Farmland Conservation                               | 0.002  | 0.070 | 0.029  | 1.000 |
| Control of Freshwater Invasive Species — Farmland Conservation             | -0.401 | 0.100 | -4.006 | 0.006 |
| Shrubland and Heathland Conservation — Farmland Conservation               | -0.117 | 0.065 | -1.797 | 0.913 |
| Terrestrial Mammal Conservation — Farmland Conservation                    | -0.058 | 0.036 | -1.602 | 0.967 |
| Bat Conservation — Farmland Conservation                                   | -0.322 | 0.068 | -4.735 | 0.000 |
| Amphibian Conservation — Farmland Conservation                             | -0.433 | 0.053 | -8.226 | 0.000 |
| Bee Conservation — Farmland Conservation                                   | -0.255 | 0.075 | -3.408 | 0.048 |
| Forest Conservation — Farmland Conservation                                | 0.019  | 0.048 | 0.401  | 1.000 |
| Primate Conservation — Farmland Conservation                               | -0.356 | 0.060 | -5.94  | 0.000 |
| Peatland Conservation — Farmland Conservation                              | -0.016 | 0.057 | -0.291 | 1.000 |
| Mediterranean Farmland — Farmland Conservation                             | -0.107 | 0.042 | -2.566 | 0.398 |
| Subtidal Benthic Invertebrate Conservation — Farmland Conservation         | 0.055  | 0.058 | 0.934  | 1.000 |

|                                                                |        |       |        |       |
|----------------------------------------------------------------|--------|-------|--------|-------|
| Soil Fertility — Farmland Conservation                         | -0.034 | 0.064 | -0.536 | 1.000 |
| Sustainable Aquaculture — Farmland Conservation                | -0.455 | 0.147 | -3.105 | 0.116 |
| Natural Pest Control — Bird Conservation                       | -0.026 | 0.068 | -0.382 | 1.000 |
| Control of Freshwater Invasive Species — Bird Conservation     | -0.429 | 0.099 | -4.324 | 0.002 |
| Shrubland and Heathland Conservation — Bird Conservation       | -0.144 | 0.063 | -2.306 | 0.597 |
| Terrestrial Mammal Conservation — Bird Conservation            | -0.086 | 0.032 | -2.655 | 0.337 |
| Bat Conservation — Bird Conservation                           | -0.350 | 0.067 | -5.253 | 0.000 |
| Amphibian Conservation — Bird Conservation                     | -0.461 | 0.051 | -9.093 | 0.000 |
| Bee Conservation — Bird Conservation                           | -0.283 | 0.073 | -3.887 | 0.009 |
| Forest Conservation — Bird Conservation                        | -0.009 | 0.045 | -0.190 | 1.000 |
| Primate Conservation — Bird Conservation                       | -0.384 | 0.058 | -6.617 | 0.000 |
| Peatland Conservation — Bird Conservation                      | -0.044 | 0.055 | -0.813 | 1.000 |
| Mediterranean Farmland — Bird Conservation                     | -0.135 | 0.039 | -3.482 | 0.037 |
| Subtidal Benthic Invertebrate Conservation — Bird Conservation | 0.027  | 0.056 | 0.474  | 1.000 |
| Soil Fertility — Bird Conservation                             | -0.062 | 0.062 | -1.007 | 1.000 |
| Sustainable Aquaculture — Bird Conservation                    | -0.483 | 0.146 | -3.317 | 0.063 |
| Control of Freshwater Invasive Species — Natural Pest Control  | -0.403 | 0.116 | -3.469 | 0.038 |

|                                                                               |        |       |        |       |
|-------------------------------------------------------------------------------|--------|-------|--------|-------|
| Shrubland and Heathland Conservation — Natural Pest Control                   | -0.119 | 0.087 | -1.356 | 0.994 |
| Terrestrial Mammal Conservation — Natural Pest Control                        | -0.060 | 0.069 | -0.871 | 1.000 |
| Bat Conservation — Natural Pest Control                                       | -0.324 | 0.090 | -3.600 | 0.024 |
| Amphibian Conservation — Natural Pest Control                                 | -0.435 | 0.079 | -5.501 | 0.000 |
| Bee Conservation — Natural Pest Control                                       | -0.257 | 0.095 | -2.706 | 0.304 |
| Forest Conservation — Natural Pest Control                                    | 0.017  | 0.076 | 0.228  | 1.000 |
| Primate Conservation — Natural Pest Control                                   | -0.358 | 0.084 | -4.262 | 0.002 |
| Peatland Conservation — Natural Pest Control                                  | -0.018 | 0.082 | -0.226 | 1.000 |
| Mediterranean Farmland — Natural Pest Control                                 | -0.109 | 0.072 | -1.515 | 0.981 |
| Subtidal Benthic Invertebrate Conservation — Natural Pest Control             | 0.053  | 0.083 | 0.635  | 1.000 |
| Soil Fertility — Natural Pest Control                                         | -0.036 | 0.087 | -0.419 | 1.000 |
| Sustainable Aquaculture — Natural Pest Control                                | -0.457 | 0.158 | -2.896 | 0.198 |
| Shrubland and Heathland Conservation — Control of Freshwater Invasive Species | 0.285  | 0.113 | 2.513  | 0.438 |
| Terrestrial Mammal Conservation — Control of Freshwater Invasive Species      | 0.343  | 0.100 | 3.442  | 0.042 |
| Bat Conservation — Control of Freshwater Invasive Species                     | 0.079  | 0.115 | 0.690  | 1.000 |
| Amphibian Conservation — Control of Freshwater Invasive Species               | -0.031 | 0.106 | -0.293 | 1.000 |

|                                                                                     |        |       |        |       |
|-------------------------------------------------------------------------------------|--------|-------|--------|-------|
| Bee Conservation — Control of Freshwater Invasive Species                           | 0.146  | 0.120 | 1.221  | 0.998 |
| Forest Conservation — Control of Freshwater Invasive Species                        | 0.421  | 0.105 | 4.021  | 0.005 |
| Primate Conservation — Control of Freshwater Invasive Species                       | 0.045  | 0.111 | 0.408  | 1.000 |
| Peatland Conservation — Control of Freshwater Invasive Species                      | 0.385  | 0.109 | 3.548  | 0.030 |
| Mediterranean Farmland — Control of Freshwater Invasive Species                     | 0.294  | 0.102 | 2.892  | 0.201 |
| Subtidal Benthic Invertebrate Conservation — Control of Freshwater Invasive Species | 0.456  | 0.110 | 4.160  | 0.003 |
| Soil Fertility — Control of Freshwater Invasive Species                             | 0.367  | 0.113 | 3.251  | 0.077 |
| Sustainable Aquaculture — Control of Freshwater Invasive Species                    | -0.054 | 0.174 | -0.310 | 1.000 |
| Terrestrial Mammal Conservation — Shrubland and Heathland Conservation              | 0.058  | 0.064 | 0.919  | 1.000 |
| Bat Conservation — Shrubland and Heathland Conservation                             | -0.206 | 0.086 | -2.397 | 0.528 |
| Amphibian Conservation — Shrubland and Heathland Conservation                       | -0.316 | 0.075 | -4.226 | 0.002 |
| Bee Conservation — Shrubland and Heathland Conservation                             | -0.139 | 0.091 | -1.518 | 0.980 |
| Forest Conservation — Shrubland and Heathland Conservation                          | 0.136  | 0.071 | 1.918  | 0.860 |
| Primate Conservation — Shrubland and Heathland Conservation                         | -0.240 | 0.080 | -3.002 | 0.151 |



|                                                                                   |        |       |        |       |
|-----------------------------------------------------------------------------------|--------|-------|--------|-------|
| Peatland Conservation — Shrubland and Heathland Conservation                      | 0.100  | 0.077 | 1.298  | 0.996 |
| Mediterranean Farmland — Shrubland and Heathland Conservation                     | 0.009  | 0.067 | 0.139  | 1.000 |
| Subtidal Benthic Invertebrate Conservation — Shrubland and Heathland Conservation | 0.171  | 0.078 | 2.191  | 0.686 |
| Soil Fertility — Shrubland and Heathland Conservation                             | 0.082  | 0.082 | 0.996  | 1.000 |
| Sustainable Aquaculture — Shrubland and Heathland Conservation                    | -0.339 | 0.156 | -2.178 | 0.694 |
| Bat Conservation — Terrestrial Mammal Conservation                                | -0.264 | 0.067 | -3.950 | 0.007 |
| Amphibian Conservation — Terrestrial Mammal Conservation                          | -0.375 | 0.052 | -7.230 | 0.000 |
| Bee Conservation — Terrestrial Mammal Conservation                                | -0.197 | 0.074 | -2.663 | 0.331 |
| Forest Conservation — Terrestrial Mammal Conservation                             | 0.077  | 0.046 | 1.671  | 0.952 |
| Primate Conservation — Terrestrial Mammal Conservation                            | -0.298 | 0.059 | -5.065 | 0.000 |
| Peatland Conservation — Terrestrial Mammal Conservation                           | 0.042  | 0.055 | 0.752  | 1.000 |
| Mediterranean Farmland — Terrestrial Mammal Conservation                          | -0.049 | 0.039 | -1.245 | 0.998 |
| Subtidal Benthic Invertebrate Conservation — Terrestrial Mammal Conservation      | 0.113  | 0.057 | 1.982  | 0.825 |
| Soil Fertility — Terrestrial Mammal Conservation                                  | 0.024  | 0.063 | 0.378  | 1.000 |
| Sustainable Aquaculture — Terrestrial Mammal Conservation                         | -0.397 | 0.146 | -2.720 | 0.293 |

|                                                                     |        |       |        |       |
|---------------------------------------------------------------------|--------|-------|--------|-------|
| Amphibian Conservation — Bat Conservation                           | -0.110 | 0.077 | -1.431 | 0.989 |
| Bee Conservation — Bat Conservation                                 | 0.067  | 0.094 | 0.710  | 1.000 |
| Forest Conservation — Bat Conservation                              | 0.342  | 0.074 | 4.630  | 0.000 |
| Primate Conservation — Bat Conservation                             | -0.034 | 0.082 | -0.415 | 1.000 |
| Peatland Conservation — Bat Conservation                            | 0.306  | 0.080 | 3.844  | 0.011 |
| Mediterranean Farmland — Bat Conservation                           | 0.215  | 0.069 | 3.097  | 0.118 |
| Subtidal Benthic Invertebrate Conservation — Bat Conservation       | 0.377  | 0.081 | 4.678  | 0.000 |
| Soil Fertility — Bat Conservation                                   | 0.288  | 0.085 | 3.379  | 0.052 |
| Sustainable Aquaculture — Bat Conservation                          | -0.133 | 0.157 | -0.848 | 1.000 |
| Bee Conservation — Amphibian Conservation                           | 0.177  | 0.084 | 2.117  | 0.739 |
| Forest Conservation — Amphibian Conservation                        | 0.452  | 0.061 | 7.432  | 0.000 |
| Primate Conservation — Amphibian Conservation                       | 0.076  | 0.070 | 1.085  | 1.000 |
| Peatland Conservation — Amphibian Conservation                      | 0.416  | 0.067 | 6.183  | 0.000 |
| Mediterranean Farmland — Amphibian Conservation                     | 0.325  | 0.056 | 5.829  | 0.000 |
| Subtidal Benthic Invertebrate Conservation — Amphibian Conservation | 0.487  | 0.069 | 7.042  | 0.000 |
| Soil Fertility — Amphibian Conservation                             | 0.398  | 0.074 | 5.374  | 0.000 |
| Sustainable Aquaculture — Amphibian Conservation                    | -0.023 | 0.151 | -0.150 | 1.000 |
| Forest Conservation — Bee Conservation                              | 0.275  | 0.081 | 3.411  | 0.046 |
| Primate Conservation — Bee Conservation                             | -0.101 | 0.088 | -1.142 | 0.999 |

|                                                                    |        |       |        |       |
|--------------------------------------------------------------------|--------|-------|--------|-------|
| Peatland Conservation — Bee Conservation                           | 0.239  | 0.086 | 2.777  | 0.261 |
| Mediterranean Farmland — Bee Conservation                          | 0.148  | 0.077 | 1.924  | 0.856 |
| Subtidal Benthic Invertebrate Conservation — Bee Conservation      | 0.310  | 0.087 | 3.556  | 0.028 |
| Soil Fertility — Bee Conservation                                  | 0.221  | 0.091 | 2.431  | 0.502 |
| Sustainable Aquaculture — Bee Conservation                         | -0.200 | 0.160 | -1.248 | 0.998 |
| Primate Conservation — Forest Conservation                         | -0.376 | 0.067 | -5.609 | 0.000 |
| Peatland Conservation — Forest Conservation                        | -0.036 | 0.064 | -0.562 | 1.000 |
| Mediterranean Farmland — Forest Conservation                       | -0.127 | 0.050 | -2.529 | 0.426 |
| Subtidal Benthic Invertebrate Conservation — Forest Conservation   | 0.035  | 0.065 | 0.547  | 1.000 |
| Soil Fertility — Forest Conservation                               | -0.054 | 0.070 | -0.766 | 1.000 |
| Sustainable Aquaculture — Forest Conservation                      | -0.475 | 0.149 | -3.179 | 0.094 |
| Peatland Conservation — Primate Conservation                       | 0.34   | 0.073 | 4.634  | 0.000 |
| Mediterranean Farmland — Primate Conservation                      | 0.249  | 0.062 | 3.987  | 0.006 |
| Subtidal Benthic Invertebrate Conservation — Primate Conservation  | 0.411  | 0.075 | 5.505  | 0.000 |
| Soil Fertility — Primate Conservation                              | 0.322  | 0.079 | 4.063  | 0.004 |
| Sustainable Aquaculture — Primate Conservation                     | -0.099 | 0.154 | -0.644 | 1.000 |
| Mediterranean Farmland — Peatland Conservation                     | -0.091 | 0.059 | -1.549 | 0.976 |
| Subtidal Benthic Invertebrate Conservation — Peatland Conservation | 0.071  | 0.071 | 0.994  | 1.000 |

|                                                                      |        |       |        |       |
|----------------------------------------------------------------------|--------|-------|--------|-------|
| Soil Fertility — Peatland Conservation                               | -0.018 | 0.076 | -0.235 | 1.000 |
| Sustainable Aquaculture — Peatland Conservation                      | -0.439 | 0.152 | -2.880 | 0.207 |
| Subtidal Benthic Invertebrate Conservation — Mediterranean Farmland  | 0.162  | 0.060 | 2.713  | 0.300 |
| Soil Fertility — Mediterranean Farmland                              | 0.073  | 0.066 | 1.109  | 0.999 |
| Sustainable Aquaculture — Mediterranean Farmland                     | -0.348 | 0.147 | -2.363 | 0.552 |
| Soil Fertility — Subtidal Benthic Invertebrate Conservation          | -0.089 | 0.077 | -1.150 | 0.999 |
| Sustainable Aquaculture — Subtidal Benthic Invertebrate Conservation | -0.510 | 0.153 | -3.336 | 0.059 |
| Sustainable Aquaculture — Soil Fertility                             | -0.421 | 0.155 | -2.712 | 0.300 |

Table S7 — Results of Tukey's all-pair comparisons (using results from quasi-Poisson Generalised Linear Model — see Methods) to test for statistically significant differences between the publication delay of studies in different publication sources non-journal literature, recognised journals, and unrecognised journals according to SCImago (2020)). Significance level = 0.05. p-values of 0.000 represent  $p < 0.001$ .

| Publication source comparison                  | Estimate | Standard error | t-statistic | Adjusted p-value |
|------------------------------------------------|----------|----------------|-------------|------------------|
| Recognised journals — Non-journal literature   | 0.434    | 0.044          | 9.908       | 0.000            |
| Unrecognised journals — Non-journal literature | 0.247    | 0.077          | 3.212       | 0.003            |
| Unrecognised journals — Recognised journals    | -0.187   | 0.066          | -2.840      | 0.012            |

Table S8 — Results of sensitivity analysis using quasi-Poisson Generalised Linear Models (GLM) for different time periods to assess whether the fact that more recently published studies are more likely to have a longer delay may have affected our results (see Methods). The synopsis 'Management of Captive Animals' and publication source 'non-journal literature' were set as the intercept. Values of 0.000 represent values less than 0.001.

| 1980-2020                              |          |                |         |         |
|----------------------------------------|----------|----------------|---------|---------|
| Parameter                              | Estimate | Standard Error | t-value | p-value |
| Intercept                              | -5.893   | 2.772          | -2.126  | 0.034   |
| Publication Delay                      | 0.003    | 0.001          | 2.224   | 0.026   |
| Farmland Conservation                  | 0.693    | 0.117          | 5.920   | 0.000   |
| Bird Conservation                      | 0.721    | 0.116          | 6.222   | 0.000   |
| Natural Pest Control                   | 0.693    | 0.131          | 5.283   | 0.000   |
| Control of Freshwater Invasive Species | 0.305    | 0.149          | 2.044   | 0.041   |
| Shrubland and Heathland Conservation   | 0.574    | 0.128          | 4.476   | 0.000   |
| Terrestrial Mammal Conservation        | 0.648    | 0.116          | 5.573   | 0.000   |
| Bat Conservation                       | 0.384    | 0.130          | 2.959   | 0.003   |
| Amphibian Conservation                 | 0.265    | 0.123          | 2.16    | 0.031   |
| Bee Conservation                       | 0.424    | 0.135          | 3.139   | 0.002   |

|                                            |        |       |        |       |
|--------------------------------------------|--------|-------|--------|-------|
| Forest Conservation                        | 0.719  | 0.120 | 5.967  | 0.000 |
| Primate Conservation                       | 0.339  | 0.126 | 2.699  | 0.007 |
| Peatland Conservation                      | 0.679  | 0.124 | 5.456  | 0.000 |
| Mediterranean Farmland                     | 0.593  | 0.118 | 5.024  | 0.000 |
| Subtidal Benthic Invertebrate Conservation | 0.755  | 0.125 | 6.043  | 0.000 |
| Soil Fertility                             | 0.672  | 0.128 | 5.254  | 0.000 |
| Sustainable Aquaculture                    | 0.241  | 0.184 | 1.314  | 0.189 |
| Publication source — Recognised Journal    | 0.437  | 0.044 | 9.949  | 0.000 |
| Publication source — Unrecognised Journal  | 0.245  | 0.077 | 3.178  | 0.001 |
| 1990-2020                                  |        |       |        |       |
| Intercept                                  | -0.701 | 3.512 | -0.200 | 0.842 |
| Publication Delay                          | 0.000  | 0.002 | 0.270  | 0.787 |
| Farmland Conservation                      | 0.687  | 0.118 | 5.806  | 0.000 |
| Bird Conservation                          | 0.705  | 0.117 | 6.002  | 0.000 |

|                                            |       |       |       |       |
|--------------------------------------------|-------|-------|-------|-------|
| Natural Pest Control                       | 0.674 | 0.134 | 5.028 | 0.000 |
| Control of Freshwater Invasive Species     | 0.312 | 0.151 | 2.060 | 0.039 |
| Shrubland and Heathland Conservation       | 0.575 | 0.130 | 4.416 | 0.000 |
| Terrestrial Mammal Conservation            | 0.659 | 0.118 | 5.592 | 0.000 |
| Bat Conservation                           | 0.405 | 0.131 | 3.081 | 0.002 |
| Amphibian Conservation                     | 0.280 | 0.124 | 2.257 | 0.024 |
| Bee Conservation                           | 0.421 | 0.136 | 3.092 | 0.002 |
| Forest Conservation                        | 0.719 | 0.122 | 5.905 | 0.000 |
| Primate Conservation                       | 0.422 | 0.127 | 3.326 | 0.001 |
| Peatland Conservation                      | 0.684 | 0.126 | 5.431 | 0.000 |
| Mediterranean Farmland                     | 0.600 | 0.119 | 5.026 | 0.000 |
| Subtidal Benthic Invertebrate Conservation | 0.762 | 0.126 | 6.037 | 0.000 |
| Soil Fertility                             | 0.681 | 0.129 | 5.272 | 0.000 |
| Sustainable Aquaculture                    | 0.238 | 0.185 | 1.292 | 0.197 |

|                                           |        |       |        |       |
|-------------------------------------------|--------|-------|--------|-------|
| Publication source — Recognised Journal   | 0.462  | 0.045 | 10.184 | 0.000 |
| Publication source — Unrecognised Journal | 0.203  | 0.081 | 2.502  | 0.012 |
| 2000-2020                                 |        |       |        |       |
| Intercept                                 | 6.687  | 4.910 | 1.362  | 0.173 |
| Publication Delay                         | -0.003 | 0.002 | -1.303 | 0.192 |
| Farmland Conservation                     | 0.652  | 0.127 | 5.143  | 0.000 |
| Bird Conservation                         | 0.690  | 0.126 | 5.480  | 0.000 |
| Natural Pest Control                      | 0.718  | 0.142 | 5.061  | 0.000 |
| Control of Freshwater Invasive Species    | 0.167  | 0.158 | 1.055  | 0.291 |
| Shrubland and Heathland Conservation      | 0.616  | 0.136 | 4.531  | 0.000 |
| Terrestrial Mammal Conservation           | 0.638  | 0.125 | 5.083  | 0.000 |
| Bat Conservation                          | 0.400  | 0.135 | 2.961  | 0.003 |
| Amphibian Conservation                    | 0.326  | 0.131 | 2.486  | 0.013 |
| Bee Conservation                          | 0.365  | 0.143 | 2.552  | 0.011 |



|                                            |       |       |       |       |
|--------------------------------------------|-------|-------|-------|-------|
| Forest Conservation                        | 0.739 | 0.128 | 5.755 | 0.000 |
| Primate Conservation                       | 0.490 | 0.133 | 3.687 | 0.000 |
| Peatland Conservation                      | 0.701 | 0.132 | 5.313 | 0.000 |
| Mediterranean Farmland                     | 0.616 | 0.126 | 4.884 | 0.000 |
| Subtidal Benthic Invertebrate Conservation | 0.770 | 0.131 | 5.873 | 0.000 |
| Soil Fertility                             | 0.694 | 0.135 | 5.142 | 0.000 |
| Sustainable Aquaculture                    | 0.253 | 0.178 | 1.420 | 0.156 |
| Publication source — Recognised Journal    | 0.416 | 0.045 | 9.276 | 0.000 |
| Publication source — Unrecognised Journal  | 0.266 | 0.082 | 3.243 | 0.001 |

Table S9 — Results of Tukey's all-pair comparisons (using results from quasi-Poisson Generalised Linear Model — see Methods) to test for statistically significant differences between the publication delay of studies testing interventions on species with different IUCN Red List Status categories. IUCN Red List Status acronyms: LC = Least Concern, VU = Vulnerable, EN = Endangered, CR = Critically Endangered, EW = Extinct in the Wild. Significance level = 0.05. p-values of 0.000 represent  $p < 0.001$ .

| IUCN Category comparison | Estimate | Standard error | t-statistic | Adjusted p-value |
|--------------------------|----------|----------------|-------------|------------------|
| All                      |          |                |             |                  |
| NT — LC                  | -0.065   | 0.032          | -2.048      | 0.229            |
| VU — LC                  | -0.110   | 0.034          | -3.284      | 0.008            |
| EN — LC                  | 0.079    | 0.034          | 2.334       | 0.125            |
| CR — LC                  | 0.191    | 0.051          | 3.719       | 0.002            |
| VU — NT                  | -0.046   | 0.042          | -1.079      | 0.806            |
| EN — NT                  | 0.144    | 0.043          | 3.352       | 0.007            |
| CR — NT                  | 0.256    | 0.058          | 4.436       | 0.000            |
| EN — VU                  | 0.189    | 0.043          | 4.408       | 0.000            |
| CR — VU                  | 0.302    | 0.058          | 5.179       | 0.000            |
| CR — EN                  | 0.112    | 0.055          | 2.026       | 0.239            |
| Amphibians               |          |                |             |                  |
| NT — LC                  | 0.185    | 0.199          | 0.930       | 0.876            |
| VU — LC                  | 0.033    | 0.131          | 0.249       | 0.999            |
| EN — LC                  | -0.001   | 0.137          | -0.010      | 1.000            |

|         |        |       |        |       |
|---------|--------|-------|--------|-------|
| CR — LC | 0.184  | 0.140 | 1.318  | 0.661 |
| VU — NT | -0.152 | 0.231 | -0.66  | 0.961 |
| EN — NT | -0.186 | 0.232 | -0.803 | 0.923 |
| CR — NT | -0.001 | 0.233 | -0.004 | 1.000 |
| EN — VU | -0.034 | 0.179 | -0.191 | 1.000 |
| CR — VU | 0.151  | 0.181 | 0.837  | 0.912 |
| CR — EN | 0.185  | 0.183 | 1.011  | 0.838 |
| Birds   |        |       |        |       |
| NT — LC | -0.081 | 0.032 | -2.517 | 0.076 |
| VU — LC | -0.308 | 0.050 | -6.142 | 0.000 |
| EN — LC | 0.287  | 0.055 | 5.195  | 0.000 |
| CR — LC | 0.021  | 0.083 | 0.258  | 0.999 |
| VU — NT | -0.226 | 0.056 | -4.068 | 0.000 |
| EN — NT | 0.369  | 0.061 | 6.083  | 0.000 |
| CR — NT | 0.103  | 0.086 | 1.188  | 0.735 |
| EN — VU | 0.595  | 0.072 | 8.296  | 0.000 |
| CR — VU | 0.329  | 0.095 | 3.480  | 0.004 |
| CR — EN | -0.266 | 0.097 | -2.733 | 0.043 |
| Mammals |        |       |        |       |

|         |        |       |        |       |
|---------|--------|-------|--------|-------|
| NT — LC | -0.071 | 0.065 | -1.099 | 0.799 |
| VU — LC | -0.087 | 0.050 | -1.749 | 0.391 |
| EN — LC | -0.025 | 0.046 | -0.539 | 0.982 |
| CR — LC | 0.024  | 0.067 | 0.365  | 0.996 |
| VU — NT | -0.016 | 0.073 | -0.213 | 1.000 |
| EN — NT | 0.046  | 0.072 | 0.644  | 0.966 |
| CR — NT | 0.096  | 0.086 | 1.111  | 0.792 |
| EN — VU | 0.062  | 0.058 | 1.068  | 0.815 |
| CR — VU | 0.111  | 0.075 | 1.493  | 0.553 |
| CR — EN | 0.049  | 0.073 | 0.676  | 0.959 |

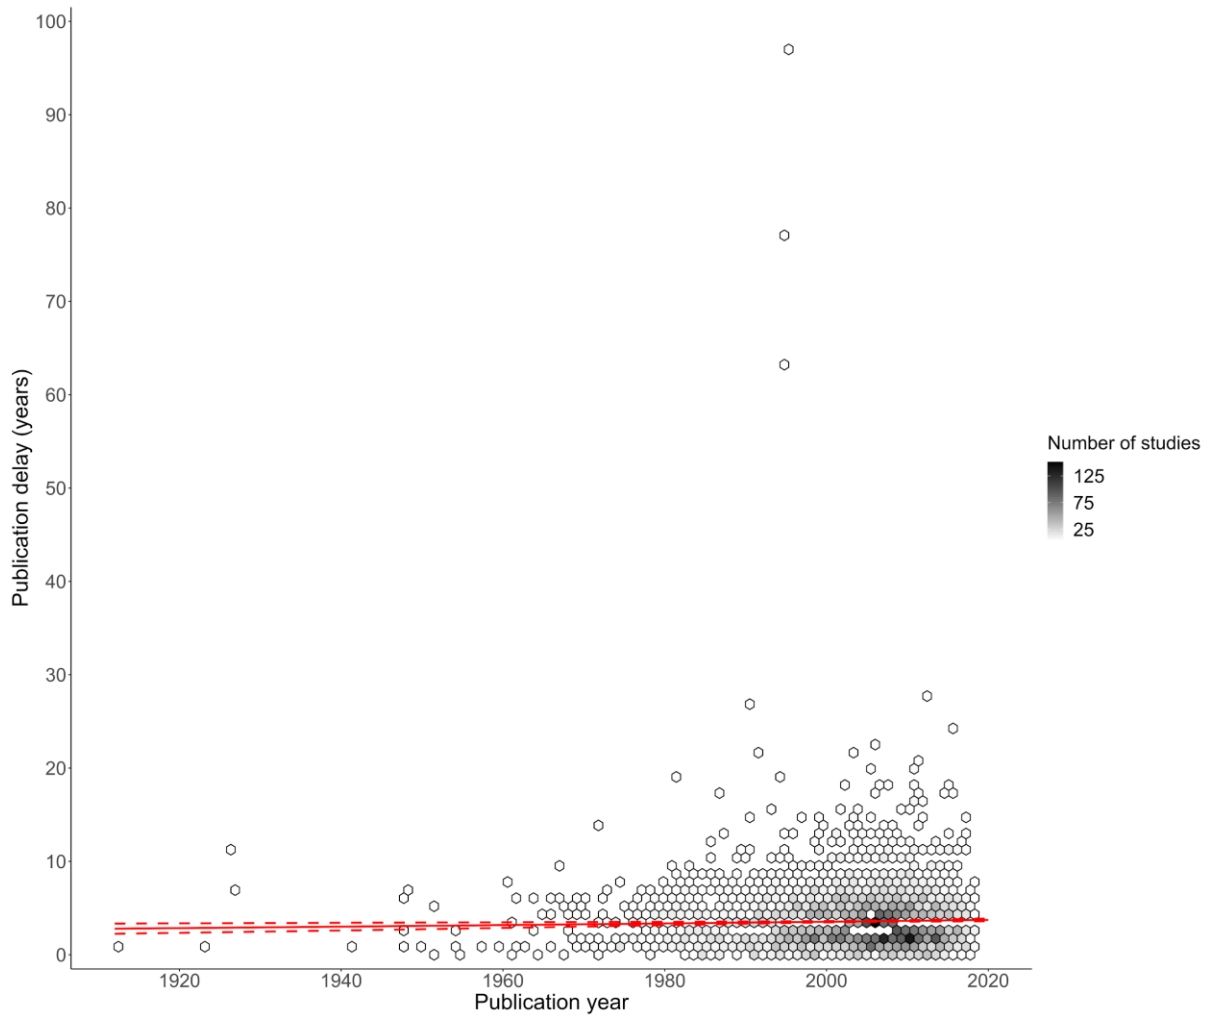

**Figure S1 – Changes in publication delay relative to the year in which studies of interventions were published. The colour of hexagons is relative to the number of data points (studies) at that position on the graph. The red solid and dotted lines represent modelled mean and 95% confidence intervals for publication delay using a quasi-Poisson Generalised Linear Model (GLM) (using only pubdate as a fixed effect — see Methods and Table S6 for full model). Data for all studies is shown here, including for a small number of studies with a publication delay greater than 20 years which were omitted from Fig.4 to improve data visualisation.**

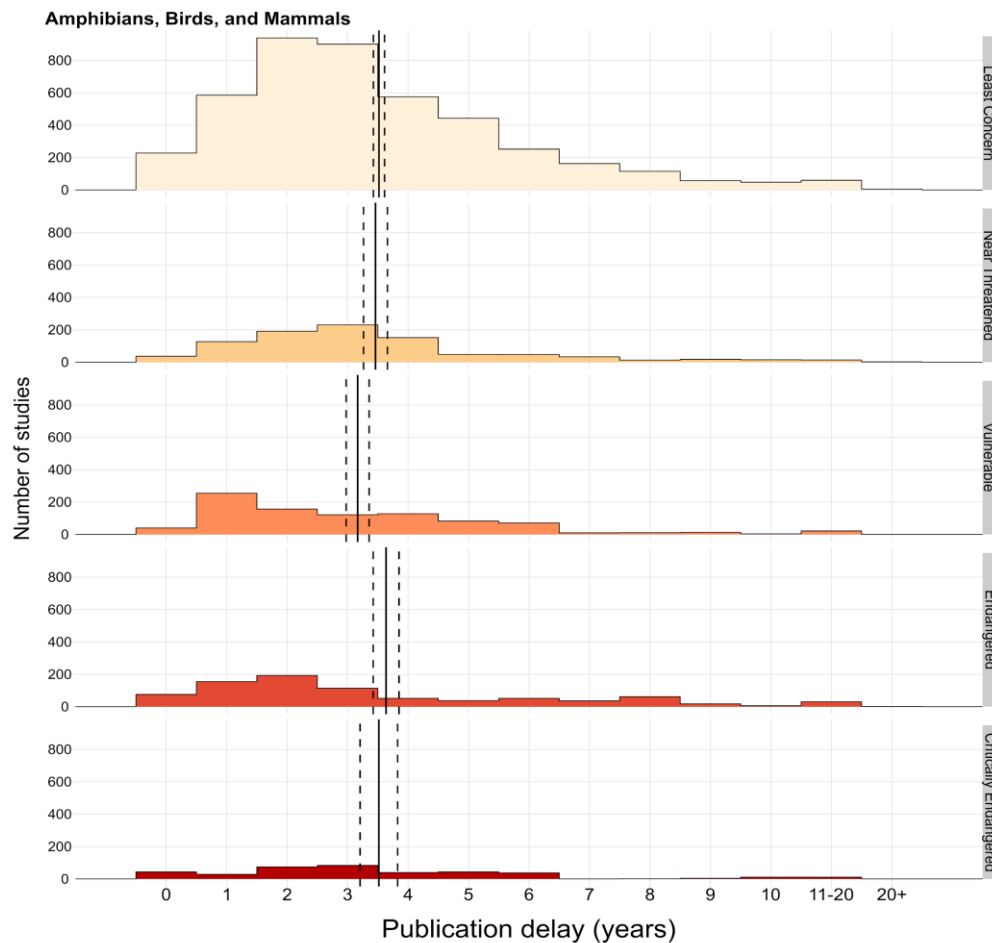

**Figure S2 – Publication delay of studies of conservation interventions (in years) grouped by the IUCN Red List Category of the species that were studied for Amphibians (Amphibia from the Amphibian Conservation synopsis), Birds (Aves from the Bird Conservation synopsis), and Mammals (Mammalia from the Bat Conservation, Primate Conservation, and Terrestrial Mammal Conservation synopses). IUCN threatened categories include Vulnerable, Endangered, and Critically Endangered, whilst non-threatened categories includes Least Concern and Near Threatened (following IUCN Red List; 2020). We did not include studies on Data Deficient and Extinct in the Wild species as there were too few studies (see Methods). Vertical solid lines show mean publication delay and dashed lines show 95% Confidence Intervals. Summary estimates were obtained from a quasi-Poisson Generalised Linear Model (GLM) with only IUCN Red List status as a fixed effect (using only data on studies from the relevant synopses above).**
